# Supplementary material for: A call for frugal modelling: two case studies involving molecular spin dynamics
Source: Royal Society of Chemistry journal article supplement (doi:10.1039/d4gc04900d), 2025-01-01
Supplement: d4gc04900d1.pdf [file d4gc04900d1.pdf]

## Supplementary information for “A call for frugal modelling: two case studies involving molecular spin dynamics”

Gerliz M. Gutiérrez-Finol,<sup>1</sup> Aman Ullah,<sup>1</sup> María González-Béjar,<sup>1</sup> and Alejandro Gaita-Ariño<sup>1, \*</sup>

<sup>1</sup>*Instituto de Ciencia Molecular (ICMol), Universitat de València, Paterna, Spain*

(Dated: January 7, 2025)

### CONTENTS

|                                                                        |   |
|------------------------------------------------------------------------|---|
| S1. Spin energy levels, vibronic couplings and spin-electric couplings | 2 |
| S2. Detailed instructions for reproducibility: second case of study    | 6 |
| Supplementary References                                               | 9 |

---

\* alejandro.gaita@uv.es

**S1. SPIN ENERGY LEVELS, VIBRONIC COUPLINGS AND SPIN-ELECTRIC COUPLINGS**

 Supplementary Table 1. Energy level scheme (in  $\text{cm}^{-1}$ ) and predominant  $M_J$  microstate of the ground multiplet of the  $\text{HoW}_{10}$  complex calculated at CASSCF-SO and REC model implemented in SIMPRE on the crystalline coordinates.

| $E^{(cryst)}(\text{cm}^{-1})$ ,<br>SIMPRE | $M_J$            | $E^{(cryst)}(\text{cm}^{-1})$ ,<br>CASSCF-SO | $M_J$             |
|-------------------------------------------|------------------|----------------------------------------------|-------------------|
| 0.00                                      | 50 %   $\pm 4$ ) | 0.00                                         | 47.5%   $\pm 4$ ) |
| 0.32                                      | 50 %   $\pm 4$ ) | 0.36                                         | 47.5%   $\pm 4$ ) |
| 32.39                                     | 50 %   $\pm 5$ ) | 26.24                                        | 47.2%   $\pm 3$ ) |
| 32.76                                     | 50 %   $\pm 5$ ) | 27.92                                        | 47.2%   $\pm 3$ ) |
| 50.27                                     | 50 %   $\pm 3$ ) | 50.08                                        | 48.7%   $\pm 5$ ) |
| 53.33                                     | 50 %   $\pm 3$ ) | 50.31                                        | 48.7%   $\pm 5$ ) |
| 132.97                                    | 40 %   $\pm 2$ ) | 86.70                                        | 48.2%   $\pm 2$ ) |
| 138.95                                    | 36 %   $\pm 2$ ) | 96.34                                        | 48.2%   $\pm 2$ ) |
| 167.48                                    | 40 %   $\pm 6$ ) | 155.59                                       | 48.9%   $\pm 1$ ) |
| 169.32                                    | 36 %   $\pm 6$ ) | 156.90                                       | 48.9%   $\pm 1$ ) |
| 222.14                                    | 50 %   $\pm 1$ ) | 178.90                                       | 46.6%   $\pm 6$ ) |
| 226.39                                    | 50 %   $\pm 1$ ) | 179.05                                       | 46.6%   $\pm 6$ ) |
| 255.06                                    | 100 %  0)        | 181.88                                       | 94.3%  0)         |
| 330.90                                    | 50 %   $\pm 7$ ) | 279.97                                       | 49.3%   $\pm 8$ ) |
| 330.92                                    | 50 %   $\pm 7$ ) | 279.97                                       | 49.3%   $\pm 8$ ) |
| 379.51                                    | 50 %   $\pm 8$ ) | 315.99                                       | 49.1%   $\pm 7$ ) |
| 379.51                                    | 50 %   $\pm 8$ ) | 315.99                                       | 49.1%   $\pm 7$ ) |

 Supplementary Table 2: Vibrational frequencies for normal mode- $i$ , related vibronic couplings ( $S_i$ ) couplings calculated at REC model and CASSCF-SO method.

| Mode (i) | Frequency ( $\text{cm}^{-1}$ ) | REC, $S_i$ ( $\text{cm}^{-1}$ ) | CASSCF-SO, $S_i$ ( $\text{cm}^{-1}$ ) |
|----------|--------------------------------|---------------------------------|---------------------------------------|
| 1        | 8.6188                         | 0.0523                          | 0.0848                                |
| 2        | 17.9408                        | 0.1352                          | 0.1758                                |
| 3        | 18.4270                        | 0.1111                          | 0.1190                                |
| 4        | 24.3339                        | 0.2348                          | 0.2469                                |
| 5        | 29.9667                        | 0.2281                          | 0.2196                                |
| 6        | 43.2222                        | 0.1668                          | 0.1228                                |
| 7        | 54.0211                        | 0.1525                          | 0.1502                                |
| 8        | 58.3858                        | 0.1867                          | 0.1805                                |
| 9        | 67.1204                        | 0.1661                          | 0.1454                                |

|    |          |        |        |
|----|----------|--------|--------|
| 10 | 70.9458  | 0.1423 | 0.1302 |
| 11 | 99.6054  | 0.0875 | 0.1249 |
| 12 | 106.5181 | 0.1242 | 0.1507 |
| 13 | 106.7797 | 0.0501 | 0.0508 |
| 14 | 107.2554 | 0.1062 | 0.1324 |
| 15 | 108.7554 | 0.1450 | 0.1667 |
| 16 | 114.6772 | 0.1045 | 0.0668 |
| 17 | 114.7083 | 0.1123 | 0.0804 |
| 18 | 140.1098 | 0.1336 | 0.1086 |
| 19 | 140.7649 | 0.0413 | 0.0400 |
| 20 | 141.1907 | 0.0538 | 0.0377 |
| 21 | 142.1063 | 0.1621 | 0.1290 |
| 22 | 143.9817 | 0.1441 | 0.1234 |
| 23 | 144.7529 | 0.0490 | 0.0393 |
| 24 | 157.6000 | 0.0213 | 0.0201 |
| 25 | 158.1734 | 0.0319 | 0.0810 |
| 26 | 159.1449 | 0.0282 | 0.0960 |
| 27 | 159.8794 | 0.0313 | 0.0422 |
| 28 | 160.5556 | 0.0225 | 0.0389 |
| 29 | 161.3001 | 0.0416 | 0.0795 |
| 30 | 167.7580 | 0.1431 | 0.0940 |
| 31 | 167.7659 | 0.1320 | 0.0833 |
| 32 | 184.6204 | 0.1046 | 0.1220 |
| 33 | 184.7316 | 0.0963 | 0.1219 |
| 34 | 193.0226 | 0.0473 | 0.0380 |
| 35 | 202.1425 | 0.1907 | 0.0948 |
| 36 | 216.4012 | 0.0333 | 0.0270 |
| 37 | 216.8891 | 0.0820 | 0.0656 |
| 38 | 218.1191 | 0.0985 | 0.0877 |
| 39 | 218.1262 | 0.1115 | 0.0992 |
| 40 | 218.2157 | 0.1155 | 0.1262 |
| 41 | 218.2437 | 0.1523 | 0.1171 |
| 42 | 219.9598 | 0.0635 | 0.0567 |
| 43 | 219.9980 | 0.0649 | 0.0544 |
| 44 | 220.0699 | 0.1268 | 0.1147 |
| 45 | 220.4673 | 0.1444 | 0.1107 |
| 46 | 223.1783 | 0.0980 | 0.0788 |
| 47 | 224.4059 | 0.1153 | 0.0724 |
| 48 | 230.8547 | 0.0421 | 0.0341 |
| 49 | 231.2420 | 0.0412 | 0.0314 |
| 50 | 231.7489 | 0.1052 | 0.0364 |
| 51 | 232.1038 | 0.1107 | 0.0360 |

|    |          |        |        |
|----|----------|--------|--------|
| 52 | 235.1329 | 0.0205 | 0.0185 |
| 53 | 235.3319 | 0.0389 | 0.0292 |
| 54 | 257.4902 | 0.1404 | 0.0967 |
| 55 | 257.4918 | 0.1396 | 0.1076 |
| 56 | 289.5509 | 0.0197 | 0.0304 |
| 57 | 291.0713 | 0.0285 | 0.0248 |
| 58 | 329.1853 | 0.1204 | 0.0905 |
| 59 | 329.2450 | 0.1356 | 0.1248 |
| 60 | 337.2649 | 0.1024 | 0.1014 |
| 61 | 337.3633 | 0.1104 | 0.1426 |
| 62 | 337.4015 | 0.1131 | 0.0993 |
| 63 | 337.7207 | 0.1586 | 0.1013 |
| 64 | 351.1875 | 0.1267 | 0.1010 |
| 65 | 354.9521 | 0.1761 | 0.1475 |
| 66 | 355.2078 | 0.1900 | 0.1478 |
| 67 | 359.0168 | 0.1225 | 0.0640 |
| 68 | 360.2627 | 0.0433 | 0.0322 |
| 69 | 363.4859 | 0.1685 | 0.0848 |
| 70 | 399.0291 | 0.0518 | 0.0412 |
| 71 | 399.7840 | 0.0758 | 0.0671 |
| 72 | 399.8049 | 0.0757 | 0.0527 |
| 73 | 404.1887 | 0.1398 | 0.0829 |
| 74 | 414.5457 | 0.1438 | 0.1413 |
| 75 | 414.9182 | 0.1357 | 0.1258 |
| 76 | 416.6709 | 0.1086 | 0.1160 |
| 77 | 416.8970 | 0.1163 | 0.1110 |
| 78 | 417.5313 | 0.1370 | 0.1311 |
| 79 | 417.6863 | 0.1292 | 0.1203 |
| 80 | 429.9499 | 0.0752 | 0.0905 |
| 81 | 431.1486 | 0.0855 | 0.0650 |
| 82 | 435.1931 | 0.0777 | 0.0826 |
| 83 | 436.3070 | 0.0353 | 0.0455 |
| 84 | 436.7230 | 0.0605 | 0.0784 |
| 85 | 437.9110 | 0.0585 | 0.0565 |
| 86 | 479.0483 | 0.0218 | 0.0839 |
| 87 | 479.3424 | 0.0178 | 0.0698 |
| 88 | 480.9600 | 0.0378 | 0.0374 |
| 89 | 481.2860 | 0.0330 | 0.0378 |
| 90 | 489.3413 | 0.0814 | 0.0554 |
| 91 | 489.3780 | 0.0718 | 0.0543 |
| 92 | 514.2890 | 0.0288 | 0.0279 |
| 93 | 515.0904 | 0.0367 | 0.0306 |

|     |          |        |        |
|-----|----------|--------|--------|
| 94  | 515.2489 | 0.0249 | 0.0286 |
| 95  | 516.2136 | 0.1167 | 0.0761 |
| 96  | 520.3149 | 0.0824 | 0.1126 |
| 97  | 521.0873 | 0.0770 | 0.1017 |
| 98  | 528.0707 | 0.0683 | 0.0860 |
| 99  | 529.2183 | 0.0732 | 0.0793 |
| 100 | 530.4589 | 0.0552 | 0.0689 |
| 101 | 531.8096 | 0.0742 | 0.0801 |
| 102 | 535.5858 | 0.0644 | 0.0906 |
| 103 | 536.2067 | 0.0574 | 0.0966 |
| 104 | 554.9824 | 0.0325 | 0.0197 |
| 105 | 555.0443 | 0.0285 | 0.0184 |
| 106 | 578.4330 | 0.0189 | 0.0313 |
| 107 | 579.0391 | 0.0232 | 0.0425 |
| 108 | 579.1319 | 0.0141 | 0.0268 |
| 109 | 579.4927 | 0.0260 | 0.0334 |

Supplementary Table 3: The shift in transition frequency ( $\delta f$ ) (MHz) obtained at different level of computation with applied voltage V.

| Applied Voltages (volts) | Experimental | REC (opt.) | REC (crys.) | CASSCF-SO (opt.) | CASSCF-SO (crys.) |
|--------------------------|--------------|------------|-------------|------------------|-------------------|
| 0                        | 0.0000       | 0.0000     | 0.0000      | 0.0000           | 0.0000            |
| 50                       | –            | 0.1548     | 1.3621      | 0.0514           | 0.1105            |
| 100                      | 0.5079       | 0.3096     | 2.7243      | 0.0970           | 0.2221            |
| 150                      | 0.8447       | 0.4644     | 4.0866      | 0.1481           | 0.3347            |
| 200                      | 1.1401       | 0.6193     | 5.4490      | 0.2016           | 0.4483            |
| 250                      | 1.4200       | 0.7742     | 6.8116      | 0.2499           | 0.5630            |
| 300                      | 1.7039       | 0.9292     | 8.1743      | 0.3032           | 0.6788            |

## S2. DETAILED INSTRUCTIONS FOR REPRODUCIBILITY: SECOND CASE OF STUDY

This part offers a help for reproducing the graphics shown at Gutiérrez-Finol et al. [1], but using the new version of STOSS in Matlab. We used Matlab R2023b, 64-bit and there is no need to download other files apart from the following ones:

1. `main.m`
2. `read_data.m` (description of the system).
3. `mag_relaxation.m` (relaxation Mechanisms, Total probability for spin flipping).
4. `solve_single_p.m` (single probabilities to pass from 0 to 1, and vice versa).
5. `total_probability.m` (total probability).
6. `Boltzmann_distribution.m` (zeeman effect, Boltzmann distribution).
7. `changeable_field.m` (analysis of conditional for spin flipping).
8. `iteration_process.m` (analysis of conditional for spin flipping).
9. `mean_matrix_state.m` (for a two p-bit network, where the collective state is studied in this function).
10. `td.m` (counting coincidences of state in both p-bits applying a delayed in the response).
11. `association.m` (for a two p-bit network, the association factor is calculated).
12. `plotting.m` (graphical representation of the results).
13. `results.py` (python script for saving the results).
14. `full_data_file.csv` (file which contains all the information for few systems, from the SIMDAVIS dataset)
15. `user_configurations.xlsx` (file which contains all the information about the system, here the user specifies the parameters).

It is important to emphasize that the file named *main.m* contains the body of the simulator, the user must not change any part of the script. As the older version of STOSS, we are capable to simulate three main scenarios:

1. Magnetization decays at different temperatures at constant magnetic field.
2. Magnetization decays at different temperatures at changeable magnetic field.
3. Magnetization decays at different temperatures of two p-bit network.

Considering this idea, the user can select the type of simulation just writing the values in each variable as it is shown in Supplementary Figure 1.

Given the explanation of the case of study in the body of the paper, this part follows the calculations of two p-bit network. To reproduce the result, we present the Supplementary Table 4 with all the necessary values and its simulation (Supplementary Figure 2). In contrast, Supplementary Figure 3 shows the summary part where we could see the computational cost when we increase the number of spins of each p-bit to 1 million with 10,000 total time steps using Matlab.

|    |                                  |                |
|----|----------------------------------|----------------|
| 1  |                                  |                |
| 2  | <b>GENERAL CONFIGURATIONS</b>    |                |
| 3  |                                  |                |
| 4  | <b>N_EX</b>                      | <b>1000000</b> |
| 5  | <b>T</b>                         | <b>4</b>       |
| 6  | <b>save</b>                      | <b>0</b>       |
| 7  | <b>flag</b>                      | <b>27</b>      |
| 8  | <b>starting_mode</b>             | <b>0.5</b>     |
| 9  | <b>time_steps</b>                | <b>10000</b>   |
| 10 | <b>option</b>                    | <b>0</b>       |
| 11 | <b>option_2spin</b>              | <b>1</b>       |
| 12 |                                  |                |
| 13 | <b>CONSTANT MAGNETIC FIELD</b>   |                |
| 14 |                                  |                |
| 15 | <b>B_constant</b>                | <b>0</b>       |
| 16 |                                  |                |
| 17 | <b>CHANGEABLE MAGNETIC FIELD</b> |                |
| 18 |                                  |                |
| 19 | <b>B_max</b>                     | <b>0.00025</b> |
| 20 | <b>cycles</b>                    | <b>4</b>       |
| 21 |                                  |                |
| 22 | <b>TWO P-BITS NETWORK</b>        |                |
| 23 |                                  |                |
| 24 | <b>B_pbit2</b>                   | <b>0.02</b>    |
| 25 | <b>factor</b>                    | <b>9000</b>    |
| 26 | <b>association_factor</b>        | <b>1000</b>    |
| 27 | <b>step_association_fact</b>     | <b>1</b>       |
| 28 |                                  |                |

Supplementary Figure 1. Parameters that can be modified by the user (user\_configuration.xlsx).

Supplementary Table 4. Parameters at 4 K to analyze the effect of a p-bit to another, for  $[\text{Dy}(\text{obPc})_2] \text{Cd}[\text{Dy}(\text{obPc})_2]$ .

| Variable                | Figure 2   |
|-------------------------|------------|
| N_ex                    | 1000000    |
| T                       | 4          |
| save                    | 1          |
| flag                    | 25         |
| starting mode           | 0.5        |
| time_steps              | 10000      |
| option                  | 0          |
| option_2spin            | 1          |
| B_constant              | 0          |
| B_max                   | DNA        |
| cycles                  | DNA        |
| B_pbit2                 | 0.02       |
| factor                  | 1000       |
| association_factor      | time_steps |
| step_association_factor | 1          |

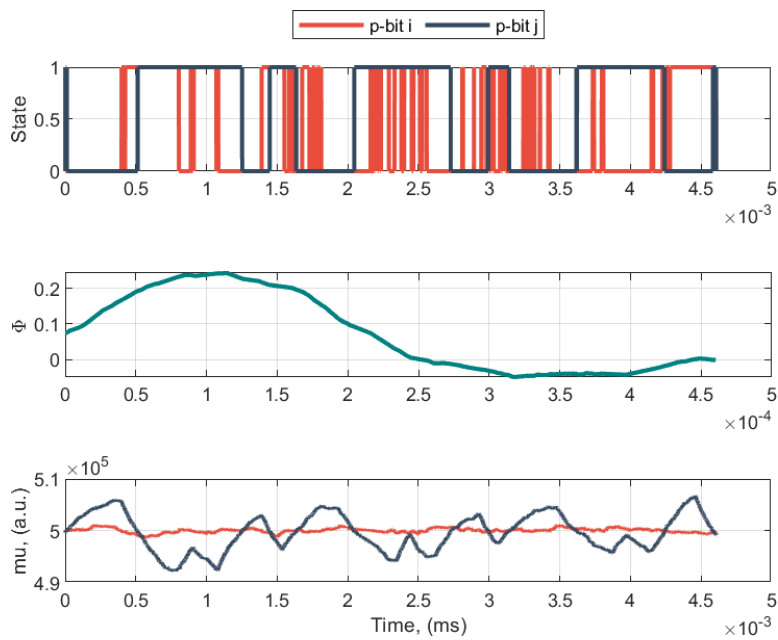Supplementary Figure 2. Simulation employing  $N = 10^6$  spins per p-bit at 4 K for  $[\text{Dy}(\text{obPc})_2] \text{Cd}[\text{Dy}(\text{obPc})_2]$ . Where part a) represents the state of each p-bit, b) the association factor, and c) the relaxation behaviour.



```

-----
First p-bit has finished
-----
*****
-----
Second p-bit has finished
-----
*****
-----
Starting association analysis between both p-bits:
-----
*****
-----
Association analysis:
-----
*****
-----
Information about the simulation
-----

Results =

7x3 table

```

| Feature              | Units        | Value      |
|----------------------|--------------|------------|
| {'Compound ID' }     | {'-' }       | 135        |
| {'Spins' }           | {'-' }       | 1e+06      |
| {'Temperature' }     | {'Kelvin' }  | 4          |
| {'Relaxation Time' } | {'seconds' } | 0.00023038 |
| {'Time step' }       | {'seconds' } | 4.6076e-07 |
| {'Steps' }           | {'-' }       | 10000      |
| {'Processing time' } | {'minutes' } | 10.03      |

```

fx >> |

```

Supplementary Figure 3. Simulation employing  $N = 10^6$  spins per p-bit at 4 K for  $[\text{Dy}(\text{obPc})_2] \text{Cd}[\text{Dy}(\text{obPc})_2]$ .

#### SUPPLEMENTARY REFERENCES

- [1] Gutiérrez-Finol GM, Giménez-Santamarina S, Hu Z, Rosaleny LE, Cardona-Serra S, Gaita-Ariño A. Lanthanide molecular nanomagnets as probabilistic bits. *npj Computational Materials*. 2023;9(1):196.
